# Supplementary material for: Long-term effects of bariatric surgery on acute kidney injury: a propensity-matched cohort in the UK Clinical Practice Research Datalink
Source: PubMed Central journal article supplement (PMC5961582; doi:10.1136/bmjopen-2017-020371), 2018-05-16
Supplement: bmjopen-2017-020371supp001.pdf [file bmjopen-2017-020371supp001.pdf]

|    |                                                                                            |
|----|--------------------------------------------------------------------------------------------|
| 1  | <b>Long-term effects of bariatric surgery on acute kidney injury: A propensity-matched</b> |
| 2  | <b>cohort in the United Kingdom Clinical Practice Research Datalink</b>                    |
| 3  |                                                                                            |
| 4  | <b>Supporting Information</b>                                                              |
| 5  |                                                                                            |
| 6  | <b>Overview</b>                                                                            |
| 7  | S1 Appendix – Code List for Identification of patients with bariatric surgery              |
| 8  | S2 Appendix – Association of potential confounders with bariatric surgery and AKI          |
| 9  | S3 Appendix – Patient selection from the original cohort                                   |
| 10 | S4 Appendix – Sensitivity Analyses                                                         |

11 **S1 Appendix**

12 *Appendix 1: Code List for identification of patients with bariatric surgery from the CPRD database as*  
13 *published by Douglas et al. [7]*

| 14 | <i>Read code</i> | <i>description</i>                      |
|----|------------------|-----------------------------------------|
| 15 | 76132.00         | Laparoscopic adjustable gastric banding |
| 16 | 76134.00         | Partitioning of stomach using staples   |
| 17 | 76131.11         | Mason vertical banded gastroplasty      |
| 18 | 76133.00         | Partitioning of stomach using band      |
| 19 | 76116.00         | Laparoscopic sleeve gastrectomy         |
| 20 | 76115.00         | Sleeve gastrectomy NEC                  |
| 21 | 76425.00         | Duodenal switch                         |
| 22 | 76135.00         | Partitioning of stomach NEC             |
| 23 | 76114.00         | Sleeve gastrectomy and duodenal switch  |
| 24 | 76166.00         | Laparoscopic gastric bypass             |

25 **S2 Appendix**

26 *Appendix 2: Identification of potential confounders in the association of bariatric surgery (exposure)*  
 27 *and the endpoint of incident AKI (outcome) in patients of the linked CPRD/HES cohort*

|                                                         | RR (95%CI)        | Change in % | Selection for multivariable model |
|---------------------------------------------------------|-------------------|-------------|-----------------------------------|
| <b>Crude effect estimate</b>                            | 0.62 (0.40, 0.95) |             |                                   |
| <b>Effect estimates when individually adjusting for</b> |                   |             |                                   |
| <b>Age</b>                                              | 0.62 (0.40, 0.95) | 0.2 %       | yes (a priori)                    |
| <b>Sex</b>                                              | 0.60 (0.39, 0.92) | 2.7 %       | yes (a priori)                    |
| <b>Calendar Time</b>                                    | 0.61 (0.40, 0.94) | 0.9%        | yes (a priori)                    |
| <b>CKD status at baseline</b>                           | 0.59 (0.38, 0.91) | 4.4 %       | yes (a priori)                    |
| <b>BMI at baseline</b>                                  | 0.53 (0.34, 0.83) | 13.9 %      | yes                               |
| <b>Alcohol Status</b>                                   | 0.61 (0.40, 0.93) | 1.3 %       | no                                |
| <b>Smoking Status</b>                                   | 0.61 (0.40, 0.94) | 0.3 %       | no                                |
| <b>History of cerebrovascular disease</b>               | 0.61 (0.40, 0.94) | 0.6 %       | no                                |
| <b>History of coronary heart disease</b>                | 0.60 (0.39, 0.91) | 3.3 %       | no                                |
| <b>History of peripheral vascular disease</b>           | 0.64 (0.41, 0.98) | 3.2 %       | no                                |
| <b>History of other atheroma</b>                        | 0.62 (0.40, 0.95) | 0.0 %       | no                                |
| <b>History of diabetes</b>                              | 0.60 (0.39, 0.92) | 2.7%        | no                                |
| <b>History of taking oral antidiabetics</b>             | 0.55 (0.36, 0.85) | 10.4%       | yes                               |
| <b>History of taking insulin</b>                        | 0.57 (0.37, 0.87) | 7.9 %       | no                                |
| <b>History of hypertension</b>                          | 0.61 (0.40, 0.94) | 1.1 %       | no                                |
| <b>History of statin use</b>                            | 0.58 (0.38, 0.89) | 5.5 %       | no                                |
| <b>History of AKI</b>                                   | 0.42 (0.26, 0.67) | 31.9 %      | yes                               |

Variables were added individually to the univariable model testing the association between bariatric surgery and AKI. If the addition of the respective variable changed the model  $\geq 10\%$  then the variable was selected to be included in the multivariable model.

AKI = acute kidney injury, BMI = body mass index, CKD = chronic kidney disease

29 **S3 Appendix**

30 *Appendix 3: Patient selection from the original cohort as described in Douglas et al [7]*

31

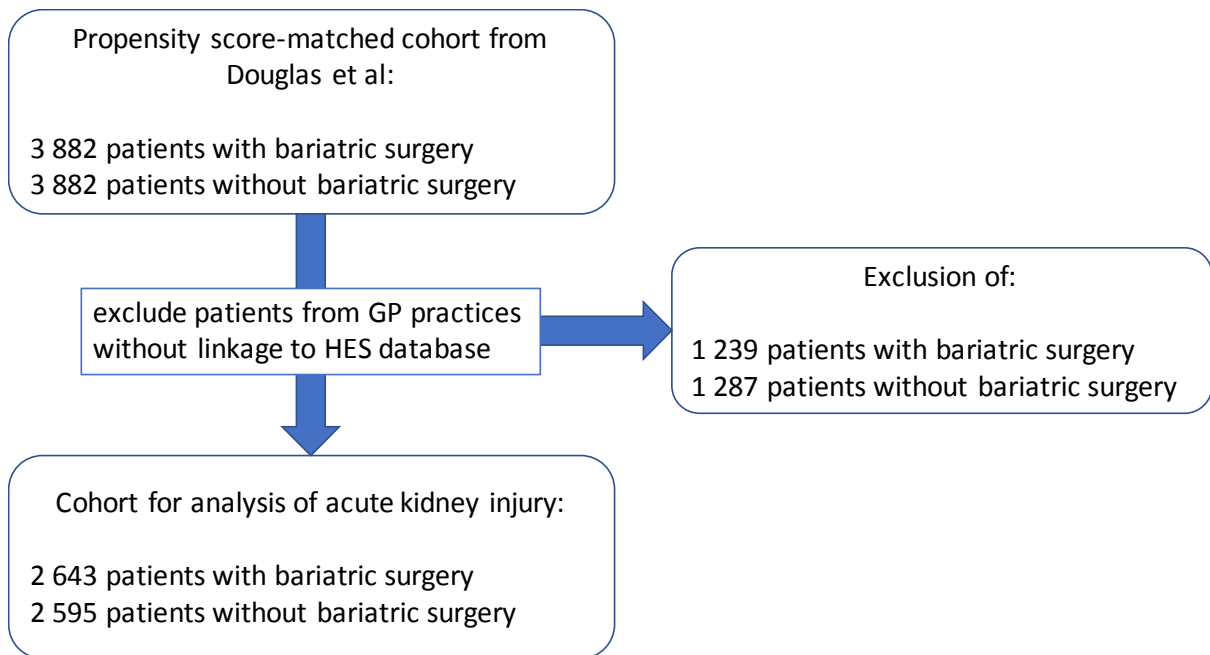

32  
33

34 **S4 Appendix**35 *Appendix 4: Sensitivity analyses for the association of bariatric surgery with acute kidney injury*

|                                                                                                                                          | PY    | Events          | Rate per 1000 PY (95% CI) | Crude RR (95% CI) <sup>1</sup>    | p-value <sup>2</sup> | Adjusted RR (95% CI) <sup>3</sup> | p-value <sup>2</sup> |
|------------------------------------------------------------------------------------------------------------------------------------------|-------|-----------------|---------------------------|-----------------------------------|----------------------|-----------------------------------|----------------------|
| <b>Restricted to patients without CKD at baseline (available serum creatinine measures + eGFR ≥60)</b>                                   |       |                 |                           |                                   |                      |                                   |                      |
| <b>Day 1-30</b>                                                                                                                          |       |                 |                           |                                   |                      |                                   |                      |
| Unexposed                                                                                                                                | 98    | 0               | 0                         | -                                 |                      |                                   |                      |
| Bariatric surgery                                                                                                                        | 111   | <5 <sup>b</sup> | 36.2 (13.6, 96.3)         | -                                 |                      |                                   |                      |
| <b>&gt;Day 30</b>                                                                                                                        |       |                 |                           |                                   |                      |                                   |                      |
| Unexposed                                                                                                                                | 3,550 | 27              | 7.6 (5.2, 11.1)           | -                                 |                      |                                   |                      |
| Bariatric surgery                                                                                                                        | 4,311 | 22              | 5.1 (3.4, 7.7)            | 0.67 (0.38, 1.18)                 | 0.165                | 0.53 (0.29, 1.00)                 | 0.050                |
| <b>Restricted to patients without known CKD at baseline (available serum creatinine measures + eGFR ≥60 or missing eGFR at baseline)</b> |       |                 |                           |                                   |                      |                                   |                      |
| <b>Day 1-30</b>                                                                                                                          |       |                 |                           |                                   |                      |                                   |                      |
| Unexposed                                                                                                                                | 199   | 0               | 0                         | -                                 |                      |                                   |                      |
| Bariatric surgery                                                                                                                        | 195   | <5 <sup>b</sup> | 20.5 (7.7, 54.7)          | -                                 |                      |                                   |                      |
| <b>&gt;Day 30</b>                                                                                                                        |       |                 |                           |                                   |                      |                                   |                      |
| Unexposed                                                                                                                                | 7,735 | 42              | 5.4 (4.0, 7.3)            | -                                 |                      |                                   |                      |
| Bariatric surgery                                                                                                                        | 7,930 | 27              | 3.4 (2.3, 5.0)            | 0.63 (0.39, 1.02)                 | 0.058                | 0.42 (0.25, 0.73)                 | 0.002                |
| <b>Excluding patients with CKD stage 4</b>                                                                                               |       |                 |                           |                                   |                      |                                   |                      |
| <b>Day 1-30</b>                                                                                                                          |       |                 |                           |                                   |                      |                                   |                      |
| Unexposed                                                                                                                                | 203   | 0               | 0                         | -                                 |                      |                                   |                      |
| Bariatric surgery                                                                                                                        | 198   | 5               | 25.2 (10.5, 60.6)         | -                                 |                      |                                   |                      |
| <b>&gt; Day 30</b>                                                                                                                       |       |                 |                           |                                   |                      |                                   |                      |
| Unexposed                                                                                                                                | 7,875 | 52              | 6.6 (5.0, 8.7)            | -                                 |                      |                                   |                      |
| Bariatric surgery                                                                                                                        | 8,037 | 32              | 4.0 (2.8, 5.6)            | 0.60 (0.39, 0.94)                 | 0.024                | 0.35 (0.21, 0.59)                 | <0.001               |
| <b>Restricted to patients with T2DM</b>                                                                                                  |       |                 |                           |                                   |                      |                                   |                      |
| <b>Day 1-30</b>                                                                                                                          |       |                 |                           |                                   |                      |                                   |                      |
| Unexposed                                                                                                                                | 65    | 0               | 0                         | -                                 |                      |                                   |                      |
| Bariatric surgery                                                                                                                        | 69    | <5 <sup>b</sup> | 43.6 (14.1, 135.1)        | -                                 |                      |                                   |                      |
| <b>&gt;Day 30</b>                                                                                                                        |       |                 |                           |                                   |                      |                                   |                      |
| Unexposed                                                                                                                                | 2,325 | 33              | 14.2 (10.1, 20.0)         | -                                 |                      |                                   |                      |
| Bariatric surgery                                                                                                                        | 2,548 | 18              | 7.1 (4.5, 11.2)           | 0.50 (0.28, 0.88)                 | 0.017                | 0.25 (0.13, 0.51)                 | <0.001               |
| <b>Restricted to patients with a history of taking insulin</b>                                                                           |       |                 |                           |                                   |                      |                                   |                      |
| <b>Day 1-30</b>                                                                                                                          |       |                 |                           |                                   |                      |                                   |                      |
| Unexposed                                                                                                                                | 11    | 0               | 0                         | -                                 |                      |                                   |                      |
| Bariatric surgery                                                                                                                        | 13    | 0               | 0                         | -                                 |                      |                                   |                      |
| <b>&gt;Day 30</b>                                                                                                                        |       |                 |                           |                                   |                      |                                   |                      |
| Unexposed                                                                                                                                | 321   | 11              | 34.3 (19.0, 61.9)         | -                                 |                      |                                   |                      |
| Bariatric surgery                                                                                                                        | 502   | 9               | 17.9 (9.3, 34.5)          | 0.52 (0.22, 1.26)                 | 0.150                | 0.22 (0.08, 0.64)                 | 0.005                |
| <b>Restricted to ICD-10 codes N17.0 and N17.9</b>                                                                                        |       |                 |                           |                                   |                      |                                   |                      |
| <b>Day 1-30</b>                                                                                                                          |       |                 |                           |                                   |                      |                                   |                      |
| Unexposed                                                                                                                                | 202   | 0               | 0                         | -                                 |                      |                                   |                      |
| Bariatric surgery                                                                                                                        | 199   | 5               | 25.2 (10.5, 60.5)         | -                                 |                      |                                   |                      |
| <b>&gt;Day 30</b>                                                                                                                        |       |                 |                           |                                   |                      |                                   |                      |
| Unexposed                                                                                                                                | 7,871 | 48              | 6.1 (4.6, 8.1)            | -                                 |                      |                                   |                      |
| Bariatric surgery                                                                                                                        | 8,055 | 31              | 3.8 (2.7, 5.5)            | 0.63 (0.40, 0.99)                 | 0.046                | 0.40 (0.24, 0.67)                 | <0.001               |
| <b>Having an initial post-surgery time span of 60 days instead of 30</b>                                                                 |       |                 |                           |                                   |                      |                                   |                      |
| <b>Day 1-60</b>                                                                                                                          |       |                 |                           |                                   |                      |                                   |                      |
| Unexposed                                                                                                                                | 403   | <5 <sup>b</sup> | 2.5 (0.3, 17.6)           | -                                 |                      |                                   |                      |
| Bariatric surgery                                                                                                                        | 395   | 6               | 15.2 (6.8, 33.8)          | 6.11 (0.74, 50.8)                 | 0.094                | <sup>4</sup>                      |                      |
| <b>&gt; Day 60</b>                                                                                                                       |       |                 |                           |                                   |                      |                                   |                      |
| Unexposed                                                                                                                                | 7,682 | 53              | 6.9 (5.3, 9.0)            | -                                 |                      |                                   |                      |
| Bariatric surgery                                                                                                                        | 7,864 | 33              | 4.2 (3.0, 5.9)            | 0.61 (0.39, 0.94)                 | 0.025                | 0.38 (0.23, 0.63)                 | <0.001               |
|                                                                                                                                          |       |                 |                           | Test for interaction <sup>5</sup> | 0.011                |                                   |                      |

| <b>Including patients with extreme propensity scores</b>                |       |                 |                      |                   |       |                   |        |  |
|-------------------------------------------------------------------------|-------|-----------------|----------------------|-------------------|-------|-------------------|--------|--|
| <b>Day 1-30</b>                                                         |       |                 |                      |                   |       |                   |        |  |
| Unexposed                                                               | 208   | 0               | 0                    | -                 |       |                   |        |  |
| Bariatric surgery                                                       | 206   | 5               | 24.3<br>(10.1, 58.3) | -                 |       |                   |        |  |
| <b>&gt; Day 30</b>                                                      |       |                 |                      |                   |       |                   |        |  |
| Unexposed                                                               | 8,054 | 59              | 7.3 (5.7, 9.5)       | -                 |       |                   |        |  |
| Bariatric surgery                                                       | 8,324 | 34              | 4.1 (2.9, 5.7)       | 0.56 (0.37, 0.85) | 0.007 | 0.33 (0.20, 0.54) | <0.001 |  |
| <b>Excluding patients with BMI &lt; 35 kg/m<sup>2</sup> at baseline</b> |       |                 |                      |                   |       |                   |        |  |
| <b>Day 1-30</b>                                                         |       |                 |                      |                   |       |                   |        |  |
| Unexposed                                                               | 180   | 0               | 0                    | -                 |       |                   |        |  |
| Bariatric surgery                                                       | 175   | <5 <sup>6</sup> | 22.8 (8.6, 60.9)     | -                 |       |                   |        |  |
| <b>&gt; Day 30</b>                                                      |       |                 |                      |                   |       |                   |        |  |
| Unexposed                                                               | 6,714 | 48              | 7.1 (5.4, 9.5)       | -                 |       |                   |        |  |
| Bariatric surgery                                                       | 7,100 | 32              | 4.5 (3.2, 6.4)       | 0.63 (0.40, 0.99) | 0.043 | 0.39 (0.23, 0.65) | <0.001 |  |

<sup>1</sup> Poisson regression model

<sup>2</sup> Wald test for RR, Likelihood-Ratio Test for interaction

<sup>3</sup> Poisson regression model adjusted for age at baseline, sex, calendar time, CKD at baseline, history of AKI, history of taking oral antidiabetics, and BMI at baseline

<sup>4</sup> No analysis for day 1-30 owing to sparse data

<sup>5</sup> Test for interaction of the effect estimate with the time periods 1-30 days and >30 days

<sup>6</sup> cell counts <5 have been suppressed to ensure anonymity

AKI = acute kidney injury, CKD = chronic kidney disease, PY = person-years, RR = rate ratio

36

37
